# Supplementary figures and images for: Autoantibody-based subgroups and longitudinal seroconversion in juvenile-onset systemic lupus erythematosus
Source: HighWire-hosted journal article supplement (doi:10.1136/lupus-2022-000834), 2023-04-01

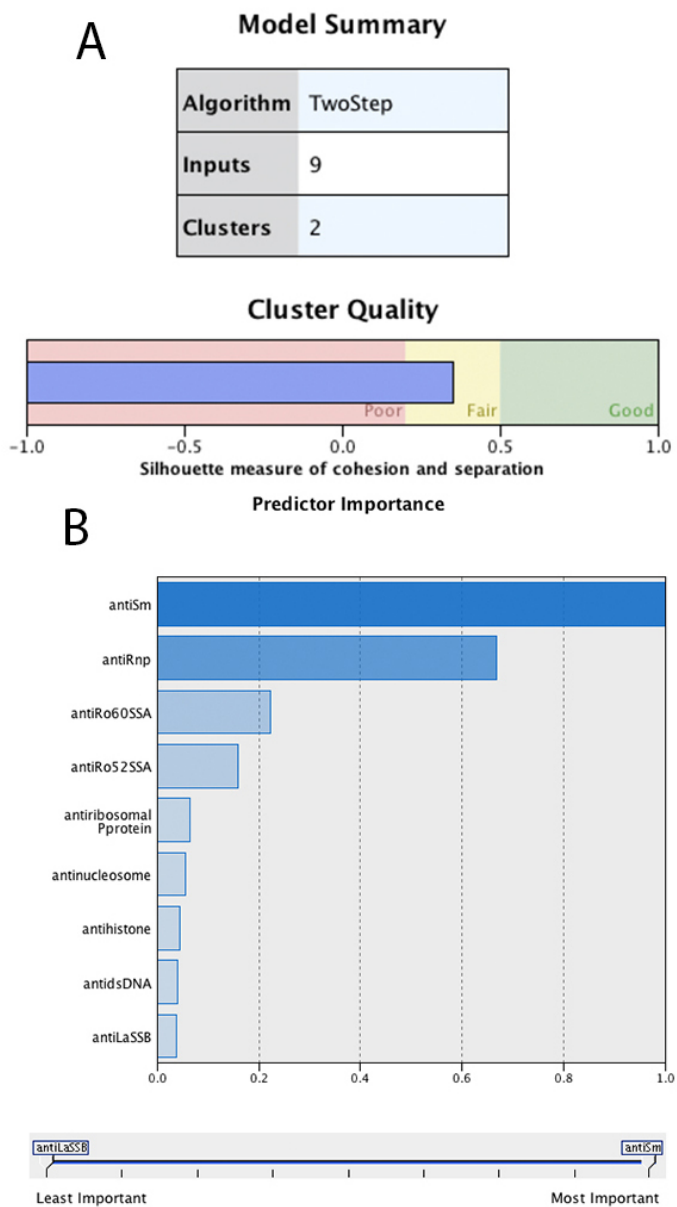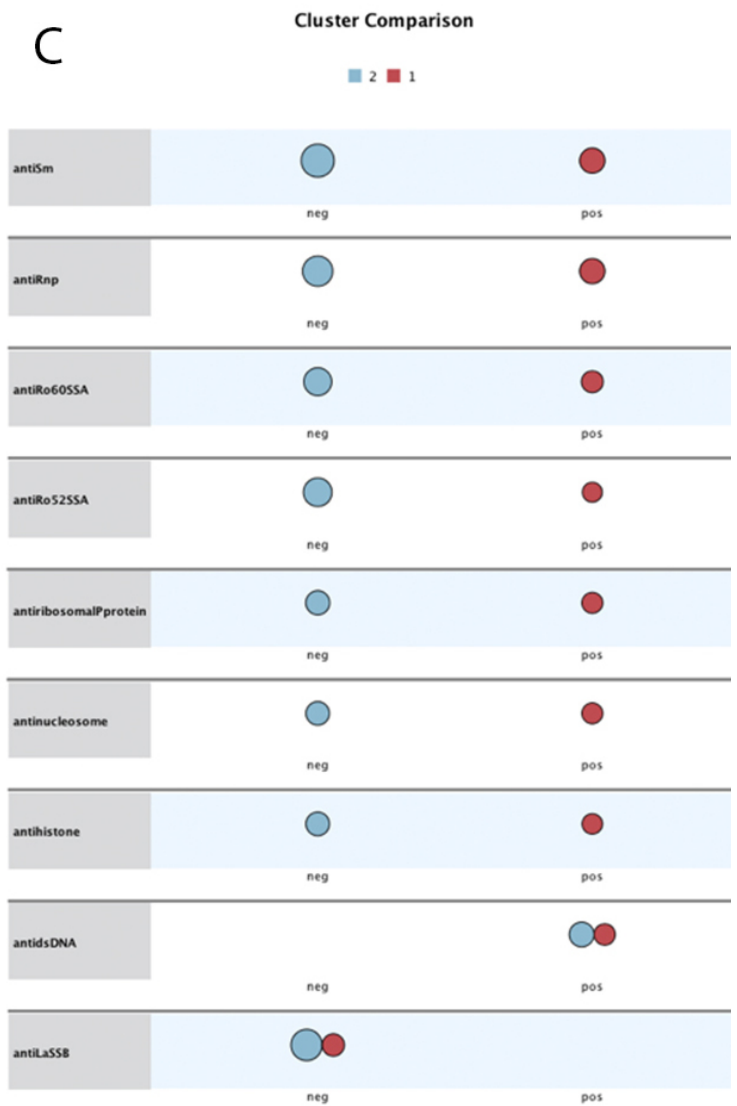

Supplement: lupus-2022-000834supp001_data_supplement.pdf [file lupus-2022-000834supp001_data_supplement.pdf]
